# Supplementary material for: Reactogenicity to the mRNA-1273 Booster According to Previous mRNA COVID-19 Vaccination
Source: MDPI journal article supplement (doi:10.3390/vaccines10081217), 2022-07-29
Supplement: s1 [file s1]

## Supplementary material

### Annex 1. Questionnaire

- Date of birth
- Sex: Women, Men, Non-binary
- Worker category: medical doctor, registered nurse, other (with patient contact), other (without patient contact).
- Have you ever experienced a severe allergy (anaphylactic shock or glottis edema)?: yes, no
- What caused this reaction?: medications, other
- Do you have or have had a chronic condition (such as cardiac insufficiency, ischemic heart disease, asthma, diabetes, chronic bronchitis, neurological disease, renal failure or chronic liver disease)?: yes, no
- Have you ever had COVID-19?: yes, no
- Date of COVID-19 diagnosis
- How serious were your COVID-19 symptoms?: asymptomatic infection, mild or moderate symptoms, hospitalization
  
- Date of vaccination dose 1
- Which COVID-19 vaccine did you receive: Pfizer, Moderna, Astra-Zeneca, Janssen, I don't know
  
- Date of vaccination dose 2
- Which COVID-19 vaccine did you receive: Pfizer, Moderna, Astra-Zeneca, Janssen, I don't know
  
- Did you have adverse reactions to COVID-19 vaccine first or second dose: yes, no
- Which adverse reactions did you suffer (multiple choice):
  - Pain at injection site
  - Swelling or redness at injection site
  - Fatigue
  - Headache
  - Muscle or joint pain
  - Chills
  - Fever ( $\geq 37.5^{\circ}$ )
  - Nausea or vomiting
  - Adenopathy / swollen lymph nodes
  - Insomnia
  - Malaise
  - Hives or rash
- How long did the adverse reactions last (in days)?
- Did you need a medical leave because of the adverse reactions?: yes, no
- Did you need medical attention because of the adverse reactions?: yes, no
- Was the adverse reaction life-threatening?: yes, no

- Date of vaccination booster
- Which COVID-19 vaccine did you receive: Pfizer, Moderna, I don't know
- Which adverse reactions did you suffer (multiple choice):
  - Pain at injection site
  - Swelling or redness at injection site
  - Fatigue
  - Headache
  - Muscle or joint pain
  - Chills
  - Fever ( $\geq 37.5^{\circ}$ )
  - Nausea or vomiting
  - Adenopathy / swollen lymph nodes
  - Insomnia
  - Malaise
  - Hives or rash
- How long did the adverse reactions last (in days)?
- Did you need a medical leave because of the adverse reactions?: yes, no
- Did you need medical attention because of the adverse reactions?: yes, no
- Was the adverse reaction life-threatening?: yes, no
- Do you allow us to access your clinical history?: yes, no
  - What is your health record ID code?

**Annex 2.** Self-reported adverse reaction to COVID-19 booster comparing history of COVID-19 infection versus no history of COVID-19 infection.

| Characteristic                                        | History of COVID-19 |              | No history of COVID-19 |              | p-value |
|-------------------------------------------------------|---------------------|--------------|------------------------|--------------|---------|
|                                                       | n = 276 (%)         | 95% CI*      | n = 946 (%)            | 95% CI*      |         |
| <b>Some adverse reaction to booster</b>               | 245 (88.8%)         | 85.0%, 92.5% | 836 (88.4%)            | 86.3%, 90.4% | 0,900   |
| <b>Duration of the reaction (days, median, IQR**)</b> | 3                   | (2, 3)       | 3                      | (2, 4)       | 0,110   |
| Pain at injection site                                | 198 (71.7%)         | 66.4%, 77.1% | 706 (74.6%)            | 71.9%, 77.4% | 0,300   |
| Swelling or redness                                   | 72 (26.1%)          | 20.9%, 31.3% | 217 (22.9%)            | 20.3%, 25.6% | 0,300   |
| Fatigue                                               | 148 (53.6%)         | 47.7%, 59.5% | 513 (54.2%)            | 51.1%, 57.4% | 0,900   |
| Headache                                              | 134 (48.6%)         | 42.7%, 54.4% | 459 (48.5%)            | 45.3%, 51.7% | >0.999  |
| Muscle or joint pain                                  | 116 (42.0%)         | 36.2%, 47.9% | 360 (38.1%)            | 35.0%, 41.1% | 0,200   |
| Chills                                                | 142 (51.4%)         | 45.6%, 57.3% | 451 (47.7%)            | 44.5%, 50.9% | 0,300   |
| Fever ( $\geq 37.5^{\circ}$ )                         | 123 (44.6%)         | 38.7%, 50.4% | 367 (38.8%)            | 35.7%, 41.9% | 0,085   |
| Nausea or vomiting                                    | 51 (18.5%)          | 13.9%, 23.1% | 148 (15.6%)            | 13.3%, 18.0% | 0,300   |
| Adenopathy                                            | 35 (12.7%)          | 8.76%, 16.6% | 142 (15.0%)            | 12.7%, 17.3% | 0,300   |
| Insomnia                                              | 26 (9.4%)           | 5.97%, 12.9% | 96 (10.1%)             | 8.22%, 12.1% | 0,700   |
| Malaise                                               | 170 (61.6%)         | 55.9%, 67.3% | 546 (57.7%)            | 54.6%, 60.9% | 0,200   |
| Hives or rash                                         | 1 (0.4%)            | 0%, 1.07%    | 17 (1.8%)              | 0.95%, 2.64% | 0,093   |
| <b>Medical leave after booster</b>                    | 54 (22.0%)          | 16.9%, 27.2% | 159 (19.0%)            | 16.4%, 21.7% | 0,300   |
| <b>Potential life threatening reaction to booster</b> | 0 (0.0%)            |              | 0 (0.0%)               |              |         |
| <b>Perception of booster more reactogenic</b>         | 144 (58.8%)         | 52.6%, 64.9% | 486 (58.1%)            | 54.8%, 61.5% | 0,900   |

\*95% CI: 95% confidence interval. \*\* IQR: interquartile range.
